# Supplementary material for: Genomic Features and Pervasive Negative Selection in Rhodanobacter Strains Isolated from Nitrate and Heavy Metal Contaminated Aquifer
Source: PubMed Central journal article supplement (PMC8809349; doi:10.1128/spectrum.02591-21), 2022-02-02
Supplement: spectrum02591-21_supp_1_seq2.pdf [file spectrum02591-21_supp_1_seq2.pdf]

## Supplementary materials for

### Genomic features and pervasive negative selection in *Rhodanobacter* strains isolated from nitrate and heavy metal contaminated aquifer

Mu Peng<sup>a,\*</sup>, Dongyu Wang<sup>b,\*</sup>, Lauren M. Lui<sup>c</sup>, Torben Nielsen<sup>c</sup>, Renmao Tian<sup>a</sup>, Megan L. Kempher<sup>a</sup>, Xuanyu Tao<sup>a</sup>, Chongle Pan<sup>b</sup>, Romy Chakraborty<sup>d</sup>, Adam M. Deutschbauer<sup>c,e</sup>, Michael P. Thorgersen<sup>f</sup>, Michael W. W. Adams<sup>f</sup>, Matthew W. Fields<sup>g,h</sup>, Terry C. Hazen<sup>i,j</sup>, Adam P. Arkin<sup>c,k</sup>, Aifen Zhou<sup>a,#</sup>, Jizhong Zhou<sup>a,d, l,m#</sup>

<sup>a</sup> Institute for Environmental Genomics, Department of Microbiology and Plant Biology, University of Oklahoma, Norman, OK, USA

<sup>b</sup> Department of Microbiology and Plant Biology, University of Oklahoma, Norman, OK, USA

<sup>c</sup> Environmental Genomics and Systems Biology Division, Lawrence Berkeley National Laboratory, Berkeley, California, USA

<sup>d</sup> Earth and Environmental Sciences Area, Lawrence Berkeley National Laboratory, Berkeley, California, USA

<sup>e</sup> Department of Plant and Microbial Biology, University of California, Berkeley, California, USA

<sup>f</sup> Department of Biochemistry and Molecular Biology, University of Georgia, Athens, Georgia, USA

<sup>g</sup> Department of Microbiology and Cell Biology, Montana State University, Bozeman, MT, USA.

<sup>h</sup> Center for Biofilm Engineering, Montana State University, Bozeman, MT, USA

<sup>i</sup>Department of Civil and Environmental Engineering, University of Tennessee, Knoxville, TN, USA

<sup>j</sup>Oak Ridge National Laboratory, Bioscience Division, Oak Ridge, TN, USA

<sup>k</sup>Department of Bioengineering, University of California, Berkeley, California, USA

<sup>l</sup>State Key Joint Laboratory of Environment Simulation and Pollution Control, School of Environment, Tsinghua University, Beijing, China

<sup>m</sup>School of Civil Engineering and Environmental Sciences, University of Oklahoma, Norman, OK, USA

Running Title: Genomic features underlying adaptation of *Rhodanobacter*

\*These authors contributed equally to this work

#Address correspondence to Aifen Zhou, Aifen.Zhou-1@ou.edu and Jizhong Zhou, [jzhou@ou.edu](mailto:jzhou@ou.edu)

## LEGENDS FOR SUPPLEMENTAL MATERIAL

**FIG S1** Synteny plot of *Rhodanobacter* genomes with FW107-2APBS1 as the reference genome. Each strain is represented by one color line, and different segments indicate the linear relationship of gene segments. The position in the reference genome is shown on the x-axis, the relative positions in target genomes shown on the y-axis. Dots indicate the stop positions of orthologous genes.

**FIG S2** COG expansion of pan-genome (orange circle) and core genome (grey circle) in *Rhodanobacter* genomes. The pairs of numbers are the number of core genes/ the numbers of pan genes.

**FIG S3** Quality of the nanopore long reads. The average identity per aligned nanopore read to the Illumina assemblies is above 0.96 (A) with the read accuracy is higher than 97% (B).

**FIG S4** Restriction enzyme digestion patterns of the genomic DNA or plasmid DNA isolated from *R. denitrificans* strains or *E. coli*. M: molecular marker. C: control, DNA samples without addition of restriction enzymes.

**TABLE S1** *Rhodanobacter* strains and the geochemical properties of the isolation wells

**TABLE S2** General genomic features of the *Rhodanobacter* genomes

**TABLE S3** Sequence differences between FW107-2APBS1 in this study and 2APBS1 in NCBI database

**TABLE S4** ANI and AAI identity matrix of eight *Rhodanobacter* genomes

**TABLE S5** Summary of putative genes related to metal resistance in eight *Rhodanobacter* strains

**TABLE S6** Summary of the nanopore sequence data

**TABLE S7** Information of 5mC methylation sites in four *R. denitrificans* strains

**TABLE S8** Information of 6mA methylation sites in four *R. denitrificans* strains

**TABLE S9** dN/dS ratios of denitrification genes, metal resistance genes, and restriction-modification genes in eight *Rhodanobacter* strains

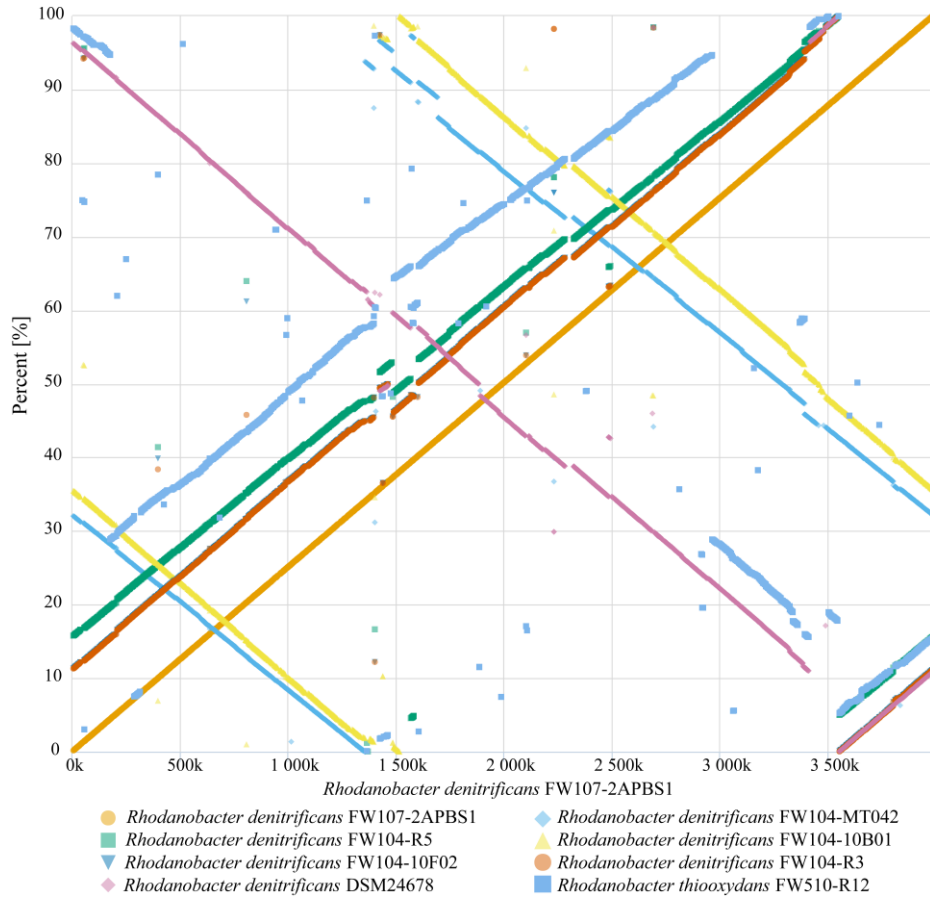

**FIG S1** Synteny plot of *Rhodanobacter* genomes with FW107-2APBS1 as the reference genome. Each strain is represented by one color line, and different segments indicate the linear relationship of gene segments. The position in the reference genome is shown on the x-axis, the relative positions in target genomes shown on the y-axis. Dots indicate the stop positions of orthologous genes.

### Information storage and processing

- Translation, ribosomal structure and biogenesis 177/46
- Replication, recombination and repair 124/559
- Transcription 147/629

### Cellular processes and signaling

- Post-translational modification, protein turnover, and chaperones 143/143
- Cell cycle control, cell division, chromosome partitioning 31/37
- Cell wall/membrane/envelope biogenesis 174/499
- Intracellular trafficking, secretion, and vesicular transport 92/115
- Signal transduction mechanisms 136/264
- Cell motility 92/51
- Defense mechanisms 55/236

### Metabolism

- Nucleotide transport and metabolism 59/42
- Amino acid transport and metabolism 222/314
- Inorganic ion transport and metabolism 144/374
- Energy production and conversion 179/236
- Coenzyme transport and metabolism 106/88
- Lipid transport and metabolism 105/230
- Secondary metabolites biosynthesis, transport, and catabolism 62/226
- Carbohydrate transport and metabolism 123/268

### Poorly characterized

- General function prediction only 336/822
- Function unknown 234/532

**FIG S2** COG expansion of pan-genome (orange circle) and core genome (grey circle) in *Rhodanobacter* genomes. The pairs of numbers are the number of core genes/ the numbers of pan genes.

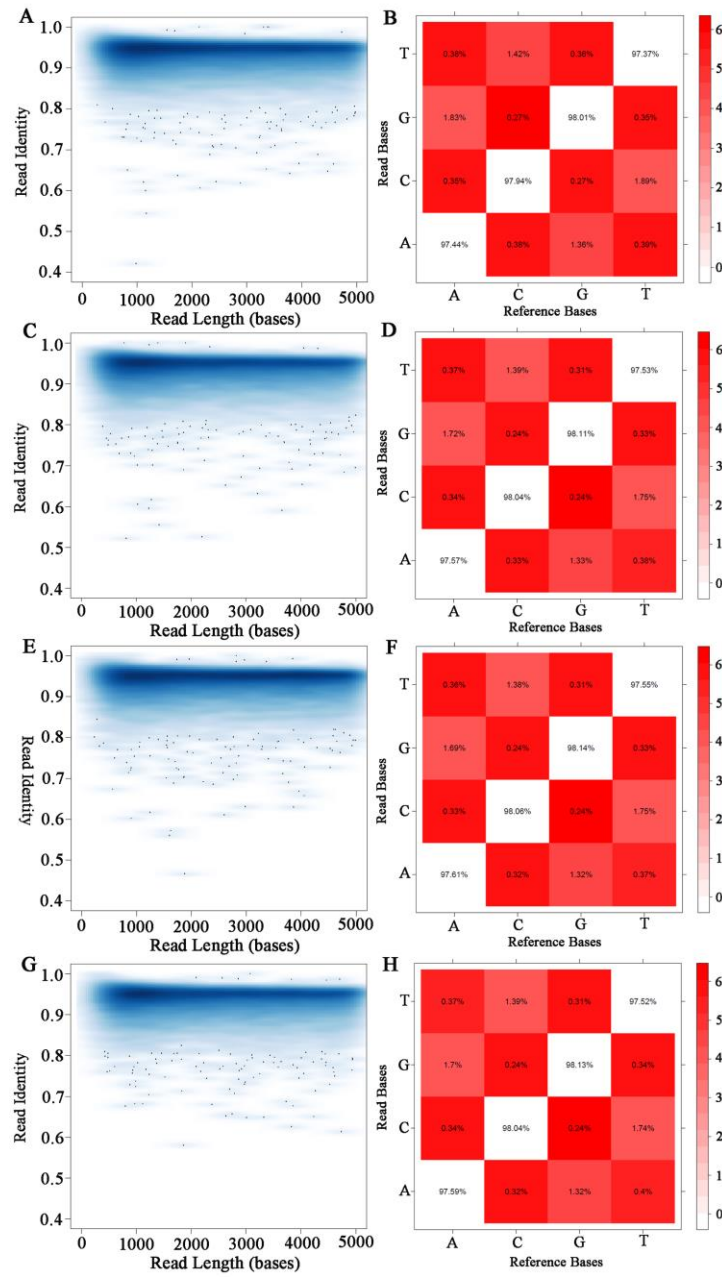

**FIG S3** Quality of the nanopore long reads. The average identity per aligned nanopore read to the Illumina assemblies is above 0.96 (A) with the read accuracy is higher than 97% (B).

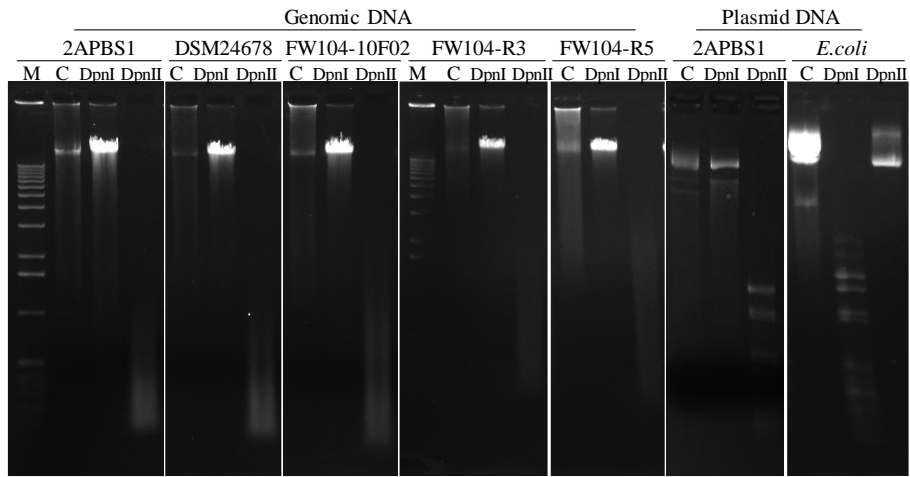

**FIG S4** Restriction enzyme digestion patterns of the genomic DNA or plasmid DNA isolated from *R. denitrificans* strains or *E. coli*. M: molecular marker. C: control, DNA samples without addition of restriction enzymes.



**TABLE S1** *Rhodanobacter* strains and the geochemical properties of the isolation wells

| Strain name   | Isolation condition                              | Isolation well                        | pH  | Nitrate (mM) | Sulfate (mM) | Uranium (mM) |
|---------------|--------------------------------------------------|---------------------------------------|-----|--------------|--------------|--------------|
| FW107-2APBS1* | Minimal synthetic ground water medium, anaerobic | FW107, moderately contaminated area 2 | 6~7 | <2           | N/A          | N/A          |
| DSM-24678#    | Potato dextrose                                  | Most highly contaminated area 3       | 3~4 | 10~100       | N/A          | N/A          |
| FW104-10B01   | R2A, aerobic, 30°C                               | FW104                                 | 5~6 | 90~150       | 3~60         | 0.04~0.14    |
| FW104-MT042   | R2A, aerobic, 30°C                               | FW104                                 | 5~6 | 90~150       | 3~60         | 0.04~0.14    |
| FW104-10F02   | R2A, aerobic, 30°C                               | FW104                                 | 5~6 | 90~150       | 3~60         | 0.04~0.14    |
| FW104-R3      | R2A, aerobic, 30°C                               | FW104                                 | 5~6 | 90~150       | 3~60         | 0.04~0.14    |
| FW104-R5      | R2A, aerobic, 30°C                               | FW104                                 | 5~6 | 90~150       | 3~60         | 0.04~0.14    |
| FW510-R12     | R2A+Mn, aerobic, 30°C                            | FW510                                 | 4   | 14           | <1           | 0.004        |

\*: complete genome sequence is available in NCBI before this work, type strain. #: purchased from DSMZ

**TABLE S2** General genomic features of the *Rhodanobacter* genomes

|                                                    | DSM24678              | FW104-10F02           | FW104-R3              | FW104-R5              | FW104-10B01         | FW510-R12           | FW104-MT042         | FW107-2APBS1        |
|----------------------------------------------------|-----------------------|-----------------------|-----------------------|-----------------------|---------------------|---------------------|---------------------|---------------------|
| Size (base pairs)                                  | 3,958,367             | 3,959,114             | 3,959,116             | 4,134,749             | 3,959,115           | 4,203,948           | 4,236,788           | 3,984,560           |
| GC content (%)                                     | 67.66                 | 67.65                 | 67.65                 | 67.62                 | 67.65               | 67.09               | 67.36               | 67.58               |
| Protein-coding genes                               | 3,707                 | 3,695                 | 3,704                 | 3,909                 | 3,706               | 3,928               | 4,035               | 3,786               |
| Proteins with functional assignments               | 2,672                 | 2,676                 | 2,676                 | 2,752                 | 2676                | 2,724               | 2,762               | 2,712               |
| Proteins with Enzyme Commission number assignments | 896                   | 895                   | 895                   | 905                   | 895                 | 923                 | 920                 | 903                 |
| Proteins with Gene Ontology assignments            | 760                   | 755                   | 755                   | 759                   | 755                 | 778                 | 779                 | 764                 |
| Proteins with Pathway assignments                  | 652                   | 650                   | 650                   | 654                   | 650                 | 689                 | 665                 | 650                 |
| Antibiotic Resistance genes                        | 36                    | 36                    | 36                    | 36                    | 36                  | 36                  | 38                  | 35                  |
| Virulence factor genes                             | 1                     | 1                     | 1                     | 1                     | 1                   | 1                   | 1                   | 1                   |
| tRNA                                               | 49                    | 49                    | 49                    | 49                    | 49                  | 49                  | 50                  | 49                  |
| rRNA                                               | 6                     | 6                     | 6                     | 6                     | 6                   | 6                   | 6                   | 6                   |
| No. of plasmids                                    | 0                     | 0                     | 0                     | 1                     | 0                   | 1                   | 1                   | 0                   |
| Sequencing platform                                | Illumina and nanopore | Illumina and nanopore | Illumina and nanopore | Illumina and nanopore | Illumina and pacbio | Illumina and pacbio | Illumina and pacbio | Illumina and pacbio |
| NCBI accession number                              | CP088919              | CP088920              | CP088921              | CP088980 & CP088981   | CP088922            | CP088923 & CP088924 | CP088925 & CP088926 | CP088918            |

**TABLE S3** Sequence differences between FW107-2APBS1 in this study and 2APBS1 in NCBI database

| Type of the difference | Location of the difference | Position of the difference | Nucleotide change | Amino acid change    | Affected gene(s)                                            |
|------------------------|----------------------------|----------------------------|-------------------|----------------------|-------------------------------------------------------------|
| SNP                    | Intergenic                 | 2,659                      | T→C               | No                   | No                                                          |
| SNP                    | Gene                       | 398,426                    | T→G               | No                   | Hypothetical protein                                        |
| Del                    | Intergenic                 | 420,688                    | -2: GC            | No                   | No                                                          |
| SNP                    | Gene                       | 528,218                    | T→A               | Ter→Lys              | Signal transduction histidine kinase CheA                   |
| Del                    | Intergenic                 | 990,568                    | -706              | No                   | No                                                          |
| Ins                    | Intergenic                 | 991,273                    | +485              | No                   | No                                                          |
| SNP                    | Gene                       | 1,090,662                  | G→C               | No                   | Hypothetical protein                                        |
| Del                    | Intergenic                 | 1,337,608                  | -1: T             | No                   | No                                                          |
| Del                    | Intergenic                 | 1,337,750                  | -1: T             | No                   | No                                                          |
| Del                    | Gene                       | 1,472,181                  | -1: T             | 380 more amino acids | CzcABC family efflux RND transporter, transmembrane protein |
| Del                    | Gene                       | 1,578,104                  | -241,020          | -71,201 amino acids  | 256 genes missing                                           |
| SNP                    | Gene                       | 1,989,582                  | T→C               | Thr→Ala              | Mercuric reductase                                          |
| SNP                    | Gene                       | 2,268,696                  | C→A               | Thr→Lys              | ABC-type efflux pump membrane fusion component YbhG         |
| Ins                    | Gene                       | 2,346,606                  | +1: G             | 54 more amino acids  | Nitrate/nitrite transporter NarK/U 1                        |
| Del                    | Intergenic                 | 2,383,369                  | -1: A             | No                   | No                                                          |
| Del                    | Intergenic                 | 2,410,869                  | -1: T             | No                   | No                                                          |
| Del                    | Intergenic                 | 2,554,159                  | -1: A             | No                   | No                                                          |
| SNP                    | Gene                       | 2,781,335                  | A→G               | Thr→Ala              | LppC putative lipoprotein                                   |
| SNP                    | Intergenic                 | 2,908,993                  | T→G               | No                   | No                                                          |
| SNP                    | Intergenic                 | 2,909,015                  | T→G               | No                   | No                                                          |
| Del                    | Intergenic                 | 3,427,464                  | -1: T             | No                   | No                                                          |

**TABLE S4** ANI and AAI identity matrix of eight *Rhodanobacter* genomes

|             | DSM24678 | FW104-<br>R5 | FW104-<br>10B01 | FW104-<br>10F02 | FW104-<br>R3 | FW107-<br>2APBS1 | MT042 | FW510-<br>R12 |
|-------------|----------|--------------|-----------------|-----------------|--------------|------------------|-------|---------------|
| DSM24678    |          | 98.26        | 98.27           | 98.27           | 98.33        | 98.17            | 98.01 | 88.84         |
| FW104-R5    | 98.9     |              | 99.66           | 99.66           | 99.68        | 98.42            | 98.55 | 88.92         |
| FW104-10B01 | 98.83    | 99.82        |                 | 100             | 100          | 98.19            | 98.31 | 89.23         |
| FW104-10F02 | 98.83    | 99.82        | 100             |                 | 100          | 98.19            | 98.31 | 89.23         |
| FW104-R3    | 98.83    | 99.82        | 100             | 100             |              | 98.19            | 98.31 | 89.23         |
| 2APBS1      | 98.66    | 98.81        | 98.71           | 98.7            | 98.7         |                  | 98.3  | 88.9          |
| FW104-MT042 | 98.74    | 98.98        | 98.92           | 98.92           | 98.91        | 98.8             |       | 88.5          |
| FW510-R12   | 89.83    | 89.84        | 89.91           | 89.91           | 89.9         | 89.81            | 89.84 |               |

Lower triangle: average amino acid identity (AAI); upper triangle: average nucleotide identity (ANI).

**TABLE S6** Summary of the nanopore sequence data

| Strain      | Nanopore reads | Mapped nanopore reads | Mapping rate of nanopore reads | Genome size (bp) | Bases (bp) covered by nanopore reads | Genome coverage rate |
|-------------|----------------|-----------------------|--------------------------------|------------------|--------------------------------------|----------------------|
| DSM24678    | 112,602        | 112,427               | 99.84%                         | 3,958,367        | 3,958,367                            | 100.00%              |
| FW104-10F02 | 72,206         | 71,958                | 99.66%                         | 3,959,114        | 3,959,114                            | 100.00%              |
| FW104-R3    | 87,045         | 86,876                | 99.81%                         | 3,959,116        | 3,959,116                            | 100.00%              |
| FW104-R5    | 85,530         | 85,234                | 99.65%                         | 4,134,749        | 4,134,749                            | 100.00%              |
